# Supplementary material for: Trends of reported foodborne diseases at the Ridge Hospital, Accra, Ghana: a retrospective review of routine data from 2009-2013
Source: BMC Infect Dis. 2016 Mar 24;16:139. doi: 10.1186/s12879-016-1472-8 (PMC4807551; doi:10.1186/s12879-016-1472-8)
Supplement: Additional file 3: — General Ward Register. (PDF 514 kb) [file 12879_2016_1472_MOESM3_ESM.pdf]

# GENERAL WARD REGISTER

Name of Hospital: \_\_\_\_\_

Name of Ward:..

Specialty:

[illegible][illegible]

- \* OUTCOME OF ADMISSION;
- \* COST OF TREATMENT;
- \* INSURANCE SCHEME;

Discharged, Died, Transferred, Abscond.  
Indicate the full cost of hospitalisation even if patient is Exempted or Covered by Insurance.  
Indicate the Insurance Schemes of patient, if patient has no insurance scheme indicate none.
